# Supplementary material for: Socio-economic impact of the COVID-19 pandemic on Overseas Filipino Workers and their left-behind families: a scoping review
Source: Frontiers journal article supplement (doi:10.3389/fpos.2024.1320021), 2024-02-07
Supplement: Table_1.XLSX [file Table_1.XLSX]

## Sheet: Table  - Charting of Results -
Title	Author	Year	Host Country	Sector	Research Questions/ Objectives	Data-gathering Methods	Effects of COVID-19 pandemic to OFWs	Coping Mechanisms and Responses	Gaps or Recommendations
Preliminary Observations from The FILLED Project (FILipino Lived Experiences during COVID-19)	Melanie D. Sabado-Liwag, Mayra Zamora, Shenaza Esmundo, Jake Ryann Sumibcay, Patchareeya P. Kwan	2022	United States of America	Filipino Americans (FilAms)	To this end, we explored the following aims: 1.Capture FilAm specific experiences and behaviors that may be different from aggregate information often reported and concentrated in epidemiologic literature. 2. Identify situational, environmental, and psychosocial factors that contribute to health outcomes and susceptibilities, such as barriers to resources, disruption or limited access to medical …	Online survey with unique link to each respondent ( n = 223	About 40% reported that they were diagnosed with a pre-existing chronic health condition before the pandemic, while 9.8% reported a new diagnosis during the pandemic. Nearly all respondents (93.3%) had some type of health care coverage and 75.6% had access to a regular health care provider (HCP). Respondents reported poor physical health (62.3%), poor mental health (82.2%), and that poor physical…	- Reliance on technology (especially video conferencing) to address social isolation for a collective community who have access to extended social support	- Modifying a data infrastructure that collects and disseminates disaggregated Asian-subgroup information around COVID-19-related health outcomes
Online Peer-Support Group’s Role in Addressing Filipino Domestic Workers’ Social Support Needs: Content and Social Media Metrics Analysis	Qijin cheng and Christine Vicera	2022	Hong Kong	Domestic workers	This study aimed to examine what types of social support a prominent online support group has provided to Filipino domestic workers in Hong Kong, how impactful each type of support was, and to what extent the support could address group members’ expressed needs.	Posts published from 1 September 2021 to December 31, 2021 (n = 599 posts)	No relevant information	A total of 516 posts (86.14%) only attended to one type of social support. Among them, the majority provided purely informational support (n = 324), followed by emotional support (n = 143) and instrumental support (n = 49) such as organizing a winter clothes drive, filling up complicated legal documents, distributing free COVID-19 testing kits, organizing skills training programs, and providing a…	- investigate whether a similar kind of online peer support group of MWDs in their countries exist and their similarities - Examine the representatives of these online group to the overall MDW population, their commonalities and differences and the new dimensions that these groups can add on our knowledge about MDWs needs, culture, group dynamics, and potential paths to wellbeing.
Overseas Filipino workers and the COVID-19 pandemic: Exploring the emotional labor of persistence	Jean Aari de Borja	2021	United Arab Emirates, Qatar	Engineer, Office Assistant	To explore the intersections of precarity, migration, and emotion, that are lived by OFWs during the COVID-19 pandemic	Three semi-structured in-depth interviews	In the host countries: They lived with fear (their on on their own), confusion of the host countries health protocol, and continuous worrying over over ones back in the Philippines. There were feelings of anger and disappointment towards the Philippines pandemic response (for the safety of their families and limited prospects for employment).	No relevant information	No relevant information
Emergent political remittances during the pandemic: Evidence from a survey of overseas Filipino workers	Imelda B. Denlia, Gabrielle Ann s. Mendoza, Ronald U. Mendoza and Jurel K. Yap	2022	Not applicable	OFWs	This article examines the experiences and assessments of OFWs on the Philippine government response to the COVID-19 pandemic	Online survey (n = 129)	- 56% were affected by job loss, shorter working hours, pay cut; - About 18% reported receiving assistance in the form of salary, basic goods, free testing, tax subsidies, and stimulus package from their host countries - 6.2% received aid from the Philippines - 49% generally satisfied with the pandemic response - Experiences of crisis management in host countries can frame demands for improvement…	No relevant information	Further studies are encouraged to evaluate how government legitimacy evaluations among OFWs have adjusted to new conditions
Anxious, Apart, and Attentive: A Qualitative Case Study of Overseas Filipino Workers’ Families in the time of COVID-19	Jerome Vespers Cleofas, Ma. Cristina SC. Eusebio, Elen Joy P. Pacudan	2021	Saudia Arabia, Singapore, Bahrain, Hong Kong	OFW families (transnational families)	migrants and the responses and measures adopted by the Philippines in 2020.	Qualitative instrumental case study of four OFW families	3 thematic analysis: “Anxious” refers to the worry that members feel over the conditions of their distant members because of the ongoing pandemic. I.e. domestic worker in HK was not allowed to go home; overworked . “Apart” refers to the extended periods of separation between family members because of travel restrictions during the pandemic, and how these affect their plans and relationships as a …	“Attentive” refers to the way OFW and left-behind family members are still able to maintain and reframe their communication to and care for each other despite the distance during the time of COVID-19. For example, use of CCTV in the house, COVID monitoring and protocols, virtual communications.	Generalizability is limited. Implication to practice: Organizations that promotes the welfare of OFWs and their families strengthen tele counseling services
Operation ‘Bring Them Home’: learning from the large-scale repatriation of overseas Filipino workers in times of crisis	Liao, Karen Anne	2020	Not applicable	Repatriated OFWs	The article examines the Philippines’ experience of large-scale OFW repatriation from host countries during crises, focusing on three key points ( repatriation as a process of facilitated return migration, challenges it face, the Philippine government’s uneven approach - comprehensive system of labour export, but less coordinated repatriation system and a less fortified reintegration policy.	Analysis of secondary documents and news articles	Repatriation experiences of OFWs: Most land-based OFW were repatriated from the Middle East and Southeast Asia, while sea-based OFW were repatriated from US and Europe. Government and private agencies funded the repatriation. The tasks entailed the coordination of several government national agencies (DFA, OWWA, DOH, DOTT). Effects of unprepared quarantine facilities (especially testing which res…	No relevant information	Repatriation is more than a return flight. It involves evacuation, post-arrival and transition to reintegration. Drawing from repatriation experiences from the past and with the current pandemic, key lessons were drawn: need for inter-agency coordination, contingency plans, forging cooperation with stakeholders, and the allocation of emergency and welfare funds.
Filipino Home Care Workers: Invisible Frontline Workers in the COVID-19 Crisis in the United States	Nasol, Katherine & Francisco-Menchavez, Valerie	2021	United States of America	Home care workers (HCWs) in residential care facilities for the elderlys (RCFEs)	To examine the physical and mental health outcomes for Filipino HCW	Mixed methods: Quantitative (Filipinx Count Survey, N = 1, 100); pilot study, N = 102;	- Even before COVID, RCFEs failed to comply with wage and labor standards - Health and safety protections are rarely reinforced (no PPEs, no health insurance provided by employer, no sick leave - Lack of access to health, employment, and government assistance (CARES Act)	Network of caregivers (community of care): sharing of resources	No relevant information
Evaluating the Implementation of a Mental Health App for Overseas Filipino Workers in Macao China: A Mixed-Methods Study of Stakeholders' Perspectives.	Andrian Liem, Karmia A. Pakingan, Melissa R. Garabiles, hao Fong Sit, Sebastian Burchert, Agnes I.F. Lam, Brian J. Hall	2022	Macao China	OFWs	This study aimed to evaluate stakeholders’ perspectives on the implementation of Kumusta Kabayan, a model phone-based mental health app for OFWs in Macao	Mixed methods: (online survey, n= 12; interview, n = 25)	No relevant information	An assessment of the mental health app revealed that it achieved its goals and also caused some problems (inaccessibility of the app because of password recall failure, frustration with technical compatibility with smartphones, lack of time to use the app, the need for entertainment add-ons)	Future studies could investigate the effectivity of these gamification principles in mobile phone app for migrant workers. Additionally, a future study could explore the virtual connections among app users within the app online community using a digital ethnography method
Lived experiences of Overseas Filipino Worker (OFW) nurses working in COVID-19 intensive care units	Jane Marnel Pogoy & Jeryl C. Cutamora	2021	United Arab Emirates	Filipino nurses	The study utilized a qualitative Husserlian phenomenological approach to describe and explore the lived experiences of the OFW nurses’ caring for COVID-19 critically ill patients.	Interview with eight ICU Filipino nurses	Four themes: - Challenges During the Pandemic with the following subthemes: Away from Home, Caring for the COVID-19 Patients, and Fear of the Unknown; - Patient Care during COVID-19 with the following subthemes: COVID-19 ICU Patient Care and The Nursing Profession; Adapting to Change with the subthemes: - Living the New Normal and Protecting One’s Self from COVID-19; Resilience Amidst the Pandemi…	No relevant information	No relevant information
Projection of the Effects of the COVID-19 Pandemic on the Welfare of Remittance-Dependent Households in the Philippines	Enerelt Murakami, Satoshi Shimizutani, Fiji Yamada	2020	Not applicable	OFWs	This paper explores the potential impacts of the COVID-19 pandemic on the welfare of households in a remittance-dependent country	Household-level dataset which was collected before the pandemic (2016, 2017)	The projection show that remittance inflow will decrease by 14-20% and household spending capita will decline by 1-2% in one year	No relevant information	Future research should use the actual data after the COVID outbreak to quantify the adverse effects on household living standards.
Spirituality of hopeful risk-taking (Bahala na) among Filipino healthcare workers	Tingson, Jed Martin & Brazal, Agnes	2021	Multi-country: Canada, New Zealand, Singapore, United States of America, UK	OFW Health care workers	“This study probed into the spirituality of bahala na (hopeful risk-taking) of overseas Filipino health care workers.”	Interview of 17 Filipino Catholic nurses	Initial pandemic surge: discriminated as they are seen as possible transmitters of virus	“The spirituality of bahala na helped the nurses face the stresses brought about by the pandemic.”	No relevant information
A Reset for overseas migration: Recent developments in Filipinos` migration in the context of the COVID-19 pandemic	Jeremaiah M. Opiniano	2021	Not applicable	Repatriated OFWs	This paper explores some of the impacts of the COVID-19 pandemic on Filipino overseas	Review of secondary documents	Migrant families receiving lower income or not receiving money in certain periods. OFWs mental health were affected as a result of displacement from work, stranded abroad or stuck in quarantine facilities. On the other hand, repatriation made it possible to be reunited with their families. International remittance stood at 0.76 per cent decreased in 2020 contrary to World Bank estimates of 20 per…	No relevant information	No relevant information
Activism as Essential Work: Filipino Healthcare Workers and Human Rights in the Philippines	Joy Sales	2021	United States of America	Nurses	To examine the transnational radicalism for Filipino migrants	Review of news reports and secondary materials	-August 2020, 30% of the 193 nurses who have died from COVID-19 are Filipino (secondary material)	-Leading unions, rallies, and lobbying efforts for working conditions and government accountability - From heroism to activism for labor rights, human rights, and transnational solidarity	No relevant information
Repatriating Filipino migrant workers in the time of the pandemic	Maruja M.B. Asis	2020	Not applicable	Repatriated OFWs	This paper provides an overview of the repatriation of OFWs under this current and continuing pandemic, noting the challenges encountered and highlighting emerging good practices.	Public documents	- Before returning to the Philippines, OFWs must secure migration and health clearance - Upon arrival, must comply with testing, quarantine and onward travel to their home provinces - Denied entry by local government units (LGUs). They were seen as carriers of the disease - Spent a lot of time waiting - for their turn to be tested, the results and quarantine after quarantine (in the host countrie…	- Government provided flight, accommodation and free testing for OFWs (non-OFWs shoulder all the costs) - Launched social media pages and website for information dissemination - Partnership with recruitment agencies (monitoring the people they deployed, repatriation assistance according to law [RA 1082 amended by RA 10022; POEA MC no. 08 s. 2020]	No relevant information
Undocumented in the time of pandemic: exploring legal violence, health care and human rights of irregular Filipino migrants in Italy and the UK	Ron Bridget T. Vilog, Carlos M. Piocos III	2020	Italy, United Kingdom	Undocumented workers	The purpose of this paper is to examine the effects of states’ pandemic responses to the conditions and vulnerabilities of undocumented Filipino migrants in Italy and the UK. It also explores the role and strategies of migrant organisations in addressing the issues and concerns of undocumented workers.	Government reports, policy briefs, reports by international organisations, interview with leaders of migrant organizations	- Undocumented workers are afraid of accessing health care systems for fear of deportation (in relation to UK’s data sharing of the National Health Service with the Home Office) - Risks of mobility. They need to fill a declaration form with their employer’s validation (problem for engaged in Black Labor or lack of contract with employers) - Lack of information compounded by hostile policies and t…	- Check on members through social media - Mobilization of resources - Local partnerships - Less solidarity work inclusive of campaigns for residency and path to citizenship of undocumented migrants	- Further policy evaluation of existing programs in the host country to ensure efficient coordination with Filipino migrant communities
Misinformation and migration during the COVID-19 pandemic: From the migrant caravan in Honduras to the Filipino diaspora	Ruth A. De Frutos García	2021	Not applicable	OFWs	This paper analyses how the most used social media platforms have spread misinformation about migrants during the pandemic in two countries: Honduras and the Philippines	Study of social media accounts; semi-structured interview of 10 journalists (including Honduras)	- Misinformation: Migrants bring disease to transient and destination countries	- Strategies to combat misinformation, xenophobia, racism and hate crimes by journalist	No relevant information
I lost a gig 'pero ok lang': Filipino migrant musicians in Australia during the COVID-19 pandemic	Carljohnson Anacin	2021	Australia	Filipino migrant musicians	This article considers the pandemic’s impacts on Filipino migrant musicians and the ways in which they demonstrate resilience through their social and cultural capital.	Interview, n = 15	- The main effect of the restrictions brought about by the pandemic on live music is the temporary closure of venues and gig and festivals cancellation - Since it is an additional income, the impact of the pandemic is not to severe	- Acceptance and resilience through by seeing their performance as a leisure and passion and not only work; by having physical and virtual networks (i.e. helping with groceries); and by having cultural capital (starting a baking business with her gig goers as customers	No relevant information
Life priority and satisfaction during the COVID-19 pandemic of OFW teachers in Thailand	Aldrin C. Go	2022	Thailand	OFW teachers	This study is action research using a quantitative approach to define the influence of Life Priorities based on Maslow’s Hierarchy of Needs	Online survey, n = 264	- Life satisfaction correlated with psychological factors, safe and security, love and belonging and self-actualization. - Self-esteem does not correlate in any meaningful way with life satisfaction	No relevant information	Increasing the number of respondents to normalize data distribution and adding additional variables like coping strategies.
Mental health of Filipino seafarers and its implications for seafarers' education	Sanley Salvacion Abila, Iris Lavalle Acejo	2021	Multi-country	Filipino seafarers	This narrative review examines current academic literature on the mental health of Filipino seafarers working internationally, including the mental health effects of coronavirus disease 2019 (COVID-19).	Review of 28 articles based on an inclusion criteria	- coping difficulties with extended stay on board due to difficulties in crew change owing to national travel restrictions and having very opportunities for shore leave when in ports - Of the 671 respondents in the study of Pauksztat et al. [48], 32% are Filipinos. Among the respondents, 15.4% expressed being depressed almost daily, 21.9% claimed being anxious almost daily and 73.3% said they are…	No relevant information	- For future researchers to consider is the need of a culture-based conceptualisation of mental illnesses. - future research should prioritise collecting robust data on suicide among Filipino seafarers because its absence makes it very conspicuous and without it a broad and clear picture of Filipino seafarers’ mental health is incomplete.
From Imperialism to Inpatient Care: Work Differences of Filipino and White registered nurses in the United Stats and Implications for COVID-19 through an Intersectional Lens	Jennifer Nazareno, Emily Yoshioka, Alexander C. Adia, Arjee Restar, Don Operario, Catherine Ceniza Choy	2021	United States of America	Filipino nurses	To quantitatively examine the current work differences in characteristics including demographics, settings and experiences of Philippines-trained RNs and US-trained white RNs practicing in the US today.	Secondary analyses using data from the 2018 National Sample Survey of RNs (NSSRN)	- Philippines-trained RNs are disproportionately on the frontlines of acute and long-term inpatient care settings compared to US-trained white RNs - Hence, Philippines-trained RNs appear to be more frequently exposed to patients with higher acuity illnesses, including patients with comorbidities and exhibit severe symptoms related to COVID-19 - Potentially expose their loved one since they are mo…	No relevant information	- Further quantitative and qualitative research is needed to understand the health, wellbeing, and lived experiences of Philippines-trained nurses, and more broadly Filipino nurses. - Future scholarship should integrate an intersectionality framework that includes historical perspectives of imperialism and colonialism in situation public health issues.
Feeling Anxious amid the COVID-19 Pandemic: Psychosocial Correlates of Anxiety Symptoms among Filipina Domestic Helpers in Hong Kong	Nelson C. Yeung, Bishan Huang, Christine Y.K. Lau, Joseph T.F. Lau	2020	Hong Kong	Domestic workers	This study aimed to examine how job settings and arrangements (e.g., workload, su ciency of protective equipment), coping resources (social support, COVID-19 information literacy), and COVID-19-specific worries might contribute to anxiety symptoms among FDHs in Hong Kong.	Survey, n = 295	- Univariate logistic regression results showed that crowdedness in the household, insufficiency of preventive equipment, increased workload during COVID-19, COVID-19 information literacy, and COVID-19-specific worries were significantly associated with participants’ probable anxiety (GAD-7 10) - with insufficiency of protective equipment and increased workload during COVID-19 might be the strong…	Contrary to our hypotheses, social support from employers, family, friends, and community organizations was not associated with probable anxiety in univariate analysis.	-Further elucidate how social support received and satisfaction with social support contribute to people’s well-being in pandemic situations. -Future studies should also examine COVID-19-related mental-help-seeking behaviors among migrant workers
Reverse migration during Pandemic: Narratives on the quest for survival of returned migrant workers in the Philippines	Rebecca L. Astilla and Claudine Marcos	2021	Not applicable	Repatriated OFWs	This paper explores narratives about the lives of returned migrant workers during this current and ongoing global pandemic focusing on the Philippines	Interview, n = 7	- Undergo COVID screening upon arrival - Referred to quarantine facilities if there were symptoms - Prolonged quarantine due to delayed swab test results (limited facilities) - Some local government units (LGUs) barred the return of OFWs - Grief behind luxury (hotel accommodation) because he doesn’t have an income to bring home - They did not receive assistance from the government (couple loss th…	- Received 10,000 Php financial assistance through the DOLE - AKAO for OFWs - Savings - Starting an online business on their own	- For further studies, researchers can focus on other provinces aside from Bulacan or provide more in-depth analysis on the effectiveness of economic, social and psychological programs offered by various government institutions towards OFWs and their families.
Care and Solidarity in the Time of Covid-19 The Pandemic Experiences of Filipinos in the UK	Galam, Roderick	2020	United Kingdom	Nurses and undocumented workers	To provide a preliminary account of how the lives of UK-based Filipinos have been affected by COVID-19	Mixed methods: kuwentuhan, experiences with Kanlungan as a volunteer, (informal talks), online news /online campaign	Nurses: - carriers of disease - heroes (romantization) rather than workers (pay raise, PPE, etc.) Undocumented workers: - do not access health care for fear of deportation in relation to Immigration Act of 2014	Help of Kanlungan (a civil society organisation (CSO): food packs, winter clothes drive and delivery of food to newly arrived nurses, online protest and campaign (Status Now!)	No relevant information
Community of Care Amid Pandemic Inequality: The Case of Filipino Migrant Domestic Workers in the UK, Italy, and Hong Kong	Ron Bridget T. Vilog, Carlos M. Piocos III	2021	United Kingdom, Italy, Hong Kong	Domestic workers	1. How do Filipino migrant domestic worker (FMDWs) respond to experiences of pandemic inequalities prevailing in host countries? 2. How do these experiences impact their notions and delivery of care?	Semi-structured questionnaires	United Kingdom: - did not receive full compensation (employer is dead, loss their job, left the country) - government policy: 80% of salary should go to health insurance - forced to lived out / lived in (prone to abuse) - work adjustments (walking, more people to serve due to WFH arrangements, children’s behaviour) Italy: - reduced/ delayed salaries - Black Labor (for undocumemted) - inadequate h…	CSO: - Kamustahan - Food packs - Coordination with other organisations - Pool resources - Build alliances and campaign - a “home away from home” - temporary accommodations - paralegal assistance - counselling - provision of masks, sanitizers - coordinate with Philippine embassy Left-behind families: - assuage their worries (prioritise the migrants health) - budget tightly - ask them not to send m…	No relevant information
Essential and Expendable: Migrant Domestic Workers and the COVID-19 Pandemic	Pandey, Kritika; Parrenas, Rhaecel; Sabio, Gianne	2021	United States of America	Domestic workers	How have working conditions for essential workers changed during the pandemic and how can we characterise such changes?	Observation of virtual town hall meetings of two CSOs (Pilipino Workers Center - Los Angeles; Damayan Migrant Workers - New York)	- Inadequate compensation to sudden termination/ job insecurity - Lack of benefits - Coerced labour (live-in) to keep their work - Unsafe workplace (i.e. lack of PPEs, not covered by the Occupational Safety and Health Administration and other state support) - Homelessness - Invisible (vs. caregivers as heroes)	CSOs: mutual aid - Food packs - Raise funds for housing	No relevant information
From Fragility to Empowerment through Philanthropy: The Filipino Labor Migrant Community in Israel During COVID-19	Galia Sabar, Deby Babis & Naama Sabar Ben-Yehoshua	2022	Israel	Lived-in Filipino caregivers (FCGs)	To explore the daily life challenges of live-in FCS for the elderly during the COVID-19 lockdown	Mixed methods: Qualitative - 20 in-depth interviews and online ethnography; Quantitative - online survey through convenience sample, N = 288	- Live-in FCGs found themselves locked in with their employers - Loss of free time - Language barriers (all regulations are in Hebrew) - Duality - isolated but has a home and a paying job - Live-out (documented/ undocumented - becoming jobless) = nom money to buy food or pay rent	- Doing good for others/ helping - Mobilized formal and informal community organizations - target communities: Filipinos in Israel and back home - Not eligible for government programs - Forms: personal and community-based programs - A sense of belonging and connectivity for the donors and recipients - Aid of Facebook	“Notwithstanding individual and community efforts to assist those in need, hundreds of Filipinos decided to go home once the lockdown was lifted and flights resumed. The reasons and the timing are yet to be studied.”
How Mutual Aid and Community Care Ignite Further Grassroots Organizing Possibilities for Long-Term Change: Reflections from the Case of Kapit-Bisig Laban COVID Montreal (Linked Arms in the Struggle Against Covid)	Jacqueline Colting-Stol	2022	Canada	Essential workers through the Temporary Foreign Worker Program of Canada (lived-in caregivers/ domestic workers, personal support workers, nurses, and healthcare providers)	How and why do we care (and have we always cared?) for each other among our communities, in our neighbourhoods, among our kin, and in times of crises when the State again and again shows the holes, gaps, and neglect in social welfare, immigration and health policies and responses? What can we learn from the mutual aid organizing among Filipino and migrant groups that took place during COVID-19 in…	Interviews of 12 essential and community workers of Kapit-Bisig Laban COVID	Why care? A vision of long-term change (long-term possibilities of changing inequities, ie. The Temporary Foreign Worker Program that placed kin in exploitative and precarious positions in Canada); facing funding constraints by looking into support by long-term alliances; and by taking accountability from those facing precariousness and vulnerability (on the ground vs. the State)	Reliance to organizations	No relevant information
Philippine Nurse Migration: Assessing Vulnerabilities and Accessing Opportunities during the COVID-19 Pandemic	Jenny Lind Elmaco	2022	Multi-country (United Kingdom, United States of America, Switzerland, Middle East, Philippines	Filipino nurses	This chapter studies Filipino nurses’ skilled migration, factoring in their lived experiences during the onslaught of the covid-19 crisis.	Interview (n = unspecified)	- Some lost their lives while taking care of COVID 19-positive patients (UK, US) - Difficult to work in a 12-hour shift with complete PPE. Some experienced headache due to dehydration and pressure sores - Anxiety and fear for themselves and their families - Placed in COVID wards without PPE - Suffered discrimination (perceived as carriers of disease), bullying and harassment in the community espe…	- Faith - Comforting each other to release stress - Support from hospital for a while (free transportation and free food)	The intersection of the issue of nurse migration, diversity, inclusion, and gender has to be more closely examined.
The Impact of COVID-19 on Migrants in Asia and the Pacific (Extracted Annex II. Maritime Southeast Asia Case Study - Philippines)	USAID	2020	Not applicable	Repatriated OFWs (seafarers)	This desk research–based study considered the effects of COVID-19 on migration along four dimensions of resilience (health, governance, gender, and the environment) for the region as a whole, and for the subregions of mainland Southeast Asia, maritime Southeast Asia, South Asia, Central Asia, and the Pacific.	Available public documents, interview	- Filipino seafarers - most dififcult to locate and assist, there is no option but to wait for shipping companies to resume operations (highly specialized skills). - Others - stranded in the capital while waiting for testing results, stranded in transit due to limited transport options joining other locally stranded individuals (LSIs), spend their limited money on communal meals, refused being re…	Repatriated during the first few months - stranded in the capital, forced to stay in crowded dormitories while awaiting for testing results, have to shell out limited money for communal foods, one time financial assistance of 10,000 PhP (200 USD) to returning migrant workers though delays have been reported in disbursing the cash	- No relevant information
Coping Strategies as Moderators of COVID-19 Racial Discrimination in Filipino Americans	Stacey Diane Aranez Litam, Seungbin Oh	2022	United States of America	Filipino Americans (FilAms)	To address existing gaps, this study investigates the path in which pandemic-related racial discrimination impacts Filipinos Americans’ life satisfaction via depression and anxiety and examines the possible buffering role of coping strategies in the path.	Online survey (n = 205)	COVID-19-related racial discrimination was significantly negatively related to life satisfaction (β = −.208, p < .001) and positively related to depression (β = .505, p < .001) and anxiety (β = .496, p < .001).	- Prayer - Discussing problems with family and friends - Problem-focused disengagement strategies relying on traditional coping responses (tiyaga, lakas ng loob [patience, courage])	- Future longitudinal and experimental research designs are necessary to clarify the causality between the study variables. - Future studies are warranted to uncover the types of racial discrimination experiences faced by Filipino Americans during COVID-19 - Future studies are called to collect the geographic location of Filipino American and AAPI participants as discrimination experiences may di…
“We also deserve help during the pandemic”: The effect of the COVID-19 pandemic on foreign domestic workers in Hong Kong	Ingrid D. Lui, Nimisha Vandan, Sara E. Davies, Sophie Harman, Rosemary Morgan, Julia Smith, Clare Wenham, Karen Ann Grepin	2021	Hong Kong	Domestic workers	To explore the effects of the pandemics on foreign domestic workers in Hong Kong	Interview, n =15 (10 Filipino) and key informants, n = 3	- concern with effects of the pandemic in HK and the Philippines - pressure to send more money because of the worsening situation of their families back home - worsened treatment of employers (did not allow to go out on rest day, fired, do not provide PPEs, made to clean with strong chemicals, terminated contract as a result of being stranded in the Philippines) - discriminatory policies by the H…	emera	Further research is needed on the short and long-term mental health effects of this dual-country experience and how the FDW experience interacts with the home country experience of family members
Stigma towards health care providers taking care of COVID-19 patients: A multi-country study	Abdulqadir J.Nashwan, Glenn Ford D.Valdez, SadeqAL-Fayyadh, Hani Al-Najjar, Hossam Elamir, Muna Barakat, Joseph U. Almazan, Ibtesam O.Jahlan, Hawa Alabdulaziz, Nabil E.Omar, Fade Alawneh, I. Ketut Andika Priastana, AimanA lhanafi, Bilal Abu-Hussein, Malik Al-Shammari, Marwa M. Shaban, Mostafa Shaba, Hayder AL-Hadrawi, Mohammed B. Al-Jubouri, Sabah A. Jaafar, Shaymaa M.Hussein, Ayat J.Nashwan, Moh…	2022	Multi-country	Health workers	The purpose of this study is to investigate the prevalence of stigmatization during the COVID-19 pandemic among healthcare providers in seven different countries using the Stigma COVID-19 Healthcare Providers (S19-HCPs).	Online survey (n = 1726, 18% are Filipinos)	Levels of fear were higher among Filipinos. They also have the highest scores in readiness to care for COVID-19 patients and the highest mean score in the willingness to follow precautionary measures	No relevant information	No relevant information
Response strategies of Filipino nursing organizations in the US and UK under the VUCA conditions of the COVID-19 pandemic	Patricia Eunice Cantada Miraflores	2021	United States of America, United Kingdom	Filipino nursing organizations	This paper investigates the crucial role of professional organizations in responding to the Volatile, Uncertain, Complexity, and Ambiguous (VUCA) conditions faced by Filipino health workers in their host countries as frontline workers and ethnic minority migrants.	Reports and newsletter by the two organizations (PNAA and PNAUK)	- Disproportionately affected by death - Psychological trauma and volatile circumstances - Contracted the virus - Worried with their own safety and family exposure - Less access to PPEs and more likely to work in high-risk environment	- Applying evidence-based interventions at the grassroots levels - Formation of task forces within the two organizations to assess the impact of the pandemic on the Filipino community, initiate fundraising efforts and initiate programs - Reduce information overload - Translated health-related information into Filipino and Ilocano - Provided psychosocial and faith-based support - Interorganization…	No relevant information
COVID-19 and Overseas Filipino Workers: Return Migration and Reintegration into the Home Country - Th Philippine Case	Jong Woo Kang, Ma. Concepcion G. Latoja	2022	Not applicable	Repatriated OFWs	This paper profiles the return migration and reintegration of returning overseas workers into the Philippines amid the COVID-19 pandemic	Reports, public documents	- Cited IOM 2021 document (refer to OS 15) - Distressing quarantine requirements - Massive backlog of COVID-19 results led to al long waiting period of 24,000 OFWs - Reduced income flow (17% terminated without final pay; 11/4% did not receive separation or compensation pay); (female 66%, male 59% less likely to get separation pay) - 78% wanted to get a job or an income-generating activity; 24% re…	- Repatriation Guidelines for OFWs - One-time cash assistance 10,000 Php (200 USD) facilitated by OWWA AKAP and Bayanihan 2 Act - List of livelihood-oriented reintegration programs (Balik-Pinay, Balik-Hanapbuhay, etc.) - The government paid for the repatriation costs of the OFWs, but the OFWs have to pay for the repatriation costs of their families	No relevant information
COVID-19 Impact Assessment on Returned Overseas Filipino Workers	International Organization for Migration (IOM)	2021	Not applicable	Repatriated OFWs	Seeking to better understand the impact of COVID-19 on OFWs, this report is an effort to capture the experiences and challenges before, during and after an OFW migration experience	Phone survey, n = 8,332 (2.7% of estimated OFW arrival)	- 65% are between 25 - 39 years old. 56% are male, 44% are female. 20% are sea-based, 80% are land-based. 82% completed secondary and higher studies - Returning to a family size of 5.1 members (average is 4.4) - Top 3 host countries (KSA - 24%, UAE 21%, Qatar 6%) - Top 3 local destination {Region IVA, NCR, Region III) - all in the island of Luzon - Reasons for return (contract ended, told to leav…	No relevant information	No relevant information
Ensuring Decent Jobs for Returning Migrants through Skills Matching	Center for Migrant Advocacy (CMA) Philippines	2020	Not applicable	Repatriated OFWs	In May 2021, the results of the study were released in the report, COVID-19 Impact Assessment on Returned Overseas Filipino Workers (IOM, 2021). The report provides a comprehensive picture of the pro#le of returned OFWs, their experience at all stages of migration (from recruitment and preparation for migration, experiences abroad, and return), their current situation, and future plans.	Mixed methods (online and phone surveys = 261, key informant interviews, FGD)	- 9.2% have an earning when they returned - 85.4% are looking for jobs (in the Philippines, start a business, wait for future employment abroad)	It is recommended that recent and current programs on reintegration be assessed and evaluated in order to draw lessons from as government tries to respond to reintegration needs of returned migrants en masse.	No relevant information
Uncertain Homecoming: Challenges Faced by Returned Overseas Filipino Workers	Maruja MB Asis	2022	Not applicable	Repatriated OFWs	In May 2021, the results of the study were released in the report, COVID-19 Impact Assessment on Returned Overseas Filipino Workers (IOM, 2021). The report provides a comprehensive picture of the pro#le of returned OFWs, their experience at all stages ofmigration (from recruitment and preparation for migration, experiences abroad, and return), their current situation, and future plans.	Phone survey, n = 8, 206 from 8,332 (Refer to OS 15)	- Most returned returned to Luzon (61.35) with the local destinatations National Capital Region,Cavite and Laguna and Mindanao's (26.7%) Zamboanga del Sur, Misamis Oriental and Davao del Sur. - There are more male returness than females returnes contrary form the profile of OFWs based abroad - More than half of the returned OFWs are married - Almost all OFWs had complated at least high school edu…	No relevant information	No relevant information
